# Supplementary material
Source: HighWire-hosted journal article supplement (https://ijgc.bmj.com/content/30/6/853)

**Figure 3.** Final aspect of the pelvis after bladder sparing LM-LEER. On the left side the ureter, the internal Iliac vascular compartment and the Coccygeal muscle were transected while on the right side all the vascular, neuronal and urinary structures were preserved

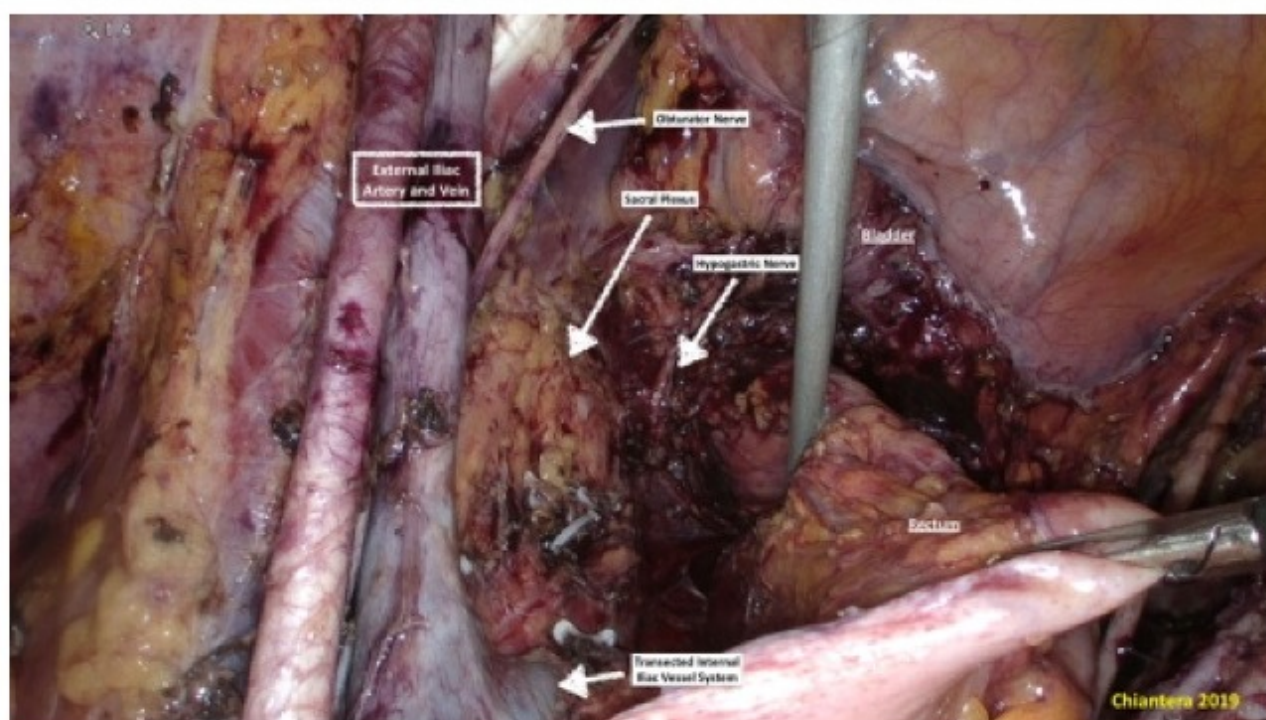

Supplement: inline-supplementary-material-2 [file inline-supplementary-material-2.pdf]
